# Supplementary material for: Highly selective and controllable pyrophosphate induced anthracene-excimer formation in water
Source: Royal Society of Chemistry journal article supplement (doi:10.1039/c3ra45681a), 2013-10-25
Supplement: c3ra45681a.pdf [file c3ra45681a.pdf]

## Electronic Supplementary Information (ESI) for

# Highly selective and controllable pyrophosphate induced anthracene-excimer formation in water

Feihu Huang and Guoqiang Feng\*

*Key Laboratory of Pesticide and Chemical Biology of Ministry of Education, College of Chemistry,  
Central China Normal University, Wuhan 430079, P.R. China,  
gf256@mail.ccnu.edu.cn*

### 1. General Experimental Details.

Starting materials were purchased from commercial suppliers and were used without further purification. 9,10-bisaminomethylanthracene<sup>1</sup> and 2-bromomethyl-6-hydroxymethylpyridine<sup>2</sup> were prepared according the previously published methods. All solvents were purified by the most used methods before use. N-(2-hydroxyethyl)piperazine-N'-(2-ethane-sulfonic acid) (HEPES) was used to prepare buffer solution and all solutions were prepared with using distilled water that had been passed through a Millipore-Q ultrapurification system. NMR spectra were measured on Varian Mercury 400 and 600 instruments. UV-vis spectra and fluorescent spectra were recorded on an Agilent Cary 100 UV-vis spectrophotometer and an Agilent Cary Eclipse fluorescence spectrophotometer, respectively. Both UV-vis and fluorescence spectrophotometer are equipped with a temperature controller. Standard quartz cuvettes with a 10 mm lightpath are used for all UV-vis spectra and fluorescent spectra measurements.

### 2. Synthesis of ZnL2

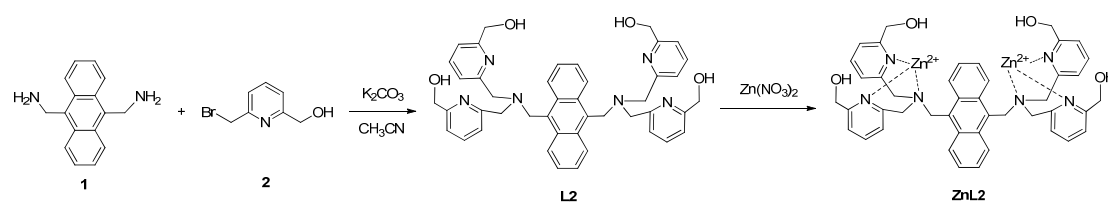

**Synthesis of L2:** To a solution of **1**<sup>1</sup> (236 mg, 1.00 mmol) and **2**<sup>2</sup> (810 mg, 4.01 mmol) in anhydrous  $CH_3CN$  (30 mL) was added  $K_2CO_3$  (621 mg, 4.50 mmol). The reaction mixture was then heated to reflux for 12 hours, and the solvent was evaporated under reduced pressure. To the residue was added dichloromethane (60 mL), and the organic phase was washed with water and brine followed by drying over  $MgSO_4$ . After removal of the solvent under reduced pressure, the crude product was purified by silica gel column (eluent: dichloromethane /methanol = 15:1 (v/v)) to give a yellow powder (576 mg, 80% yield). Mp 118–120 °C.  $^1H$  NMR (600 MHz,  $CDCl_3$ )  $\delta$  8.45 (d,  $J$  = 6.3 Hz, 4H), 7.44–7.49 (m, 8H),

7.13 (d,  $J = 7.6$  Hz, 4H), 6.95 (d,  $J = 7.6$  Hz, 4H), 4.65 (s, 8H), 4.63 (s, 4H), 3.89 (s, 8H).  $^{13}\text{C}$  NMR (150 MHz,  $\text{CDCl}_3$ ):  $\delta$  158.0, 136.7, 134.1, 130.9, 130.2, 125.4, 125.0, 121.9, 118.7, 63.9, 60.1, 51.4. IR (KBr)  $\nu_{\text{max}}$  ( $\text{cm}^{-1}$ ): 3393 (br s, OH), 2855, 1595 (s), 1577 (s), 1454 (s), 1354, 1153, 1067, 995, 789, 760, 703; ESI-MS:  $m/z$  found 721.4 ( $\text{M} + \text{H}^+$ ); HR-MS Calc. for  $\text{C}_{44}\text{H}_{45}\text{N}_6\text{O}_4^+$  ( $\text{M} + \text{H}^+$ ) 721.3497, found 721.3496.

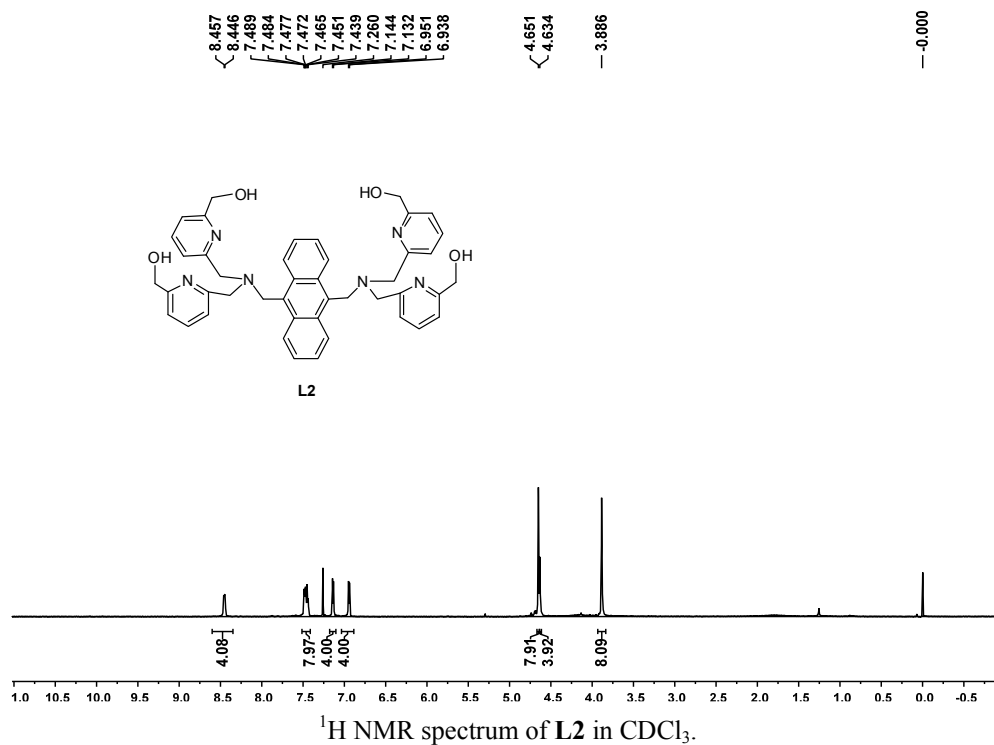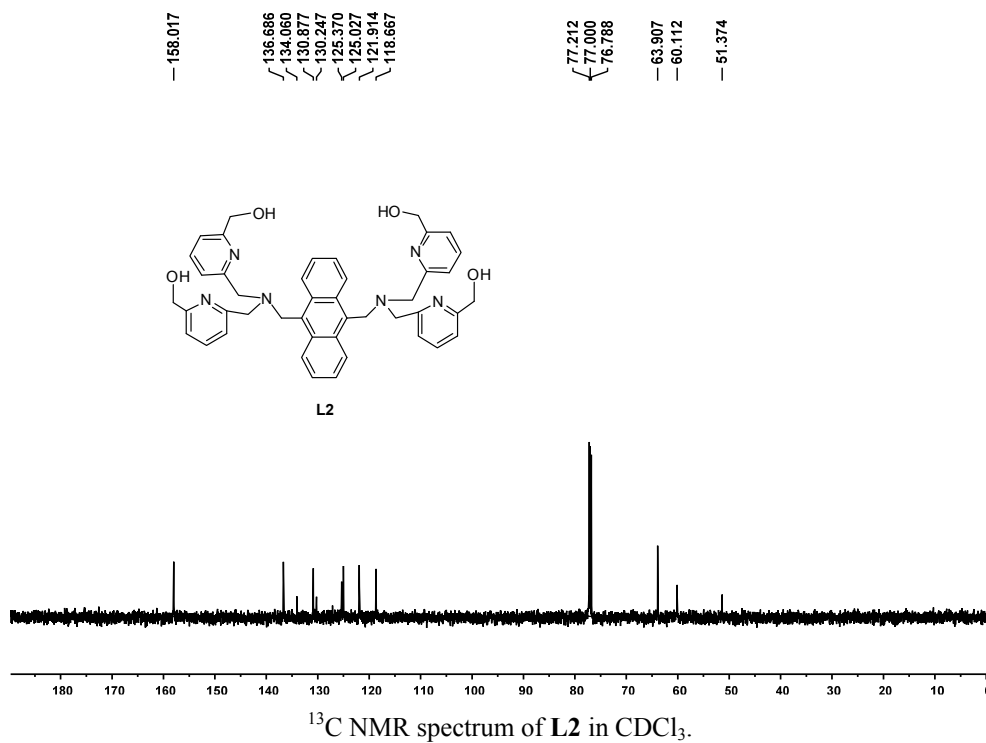

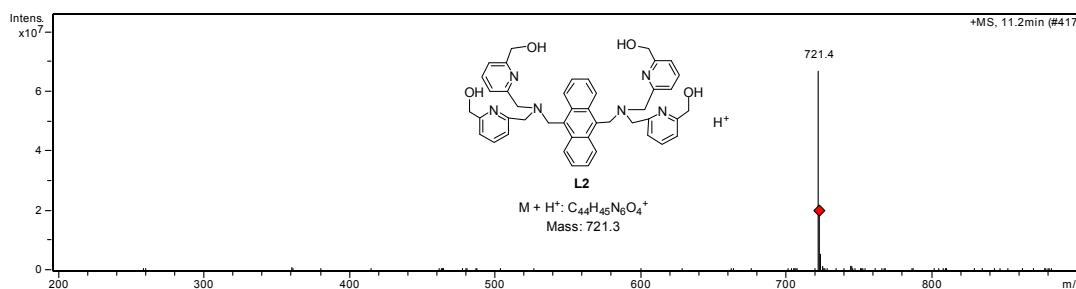

ESI-MS spectrum of **L2**

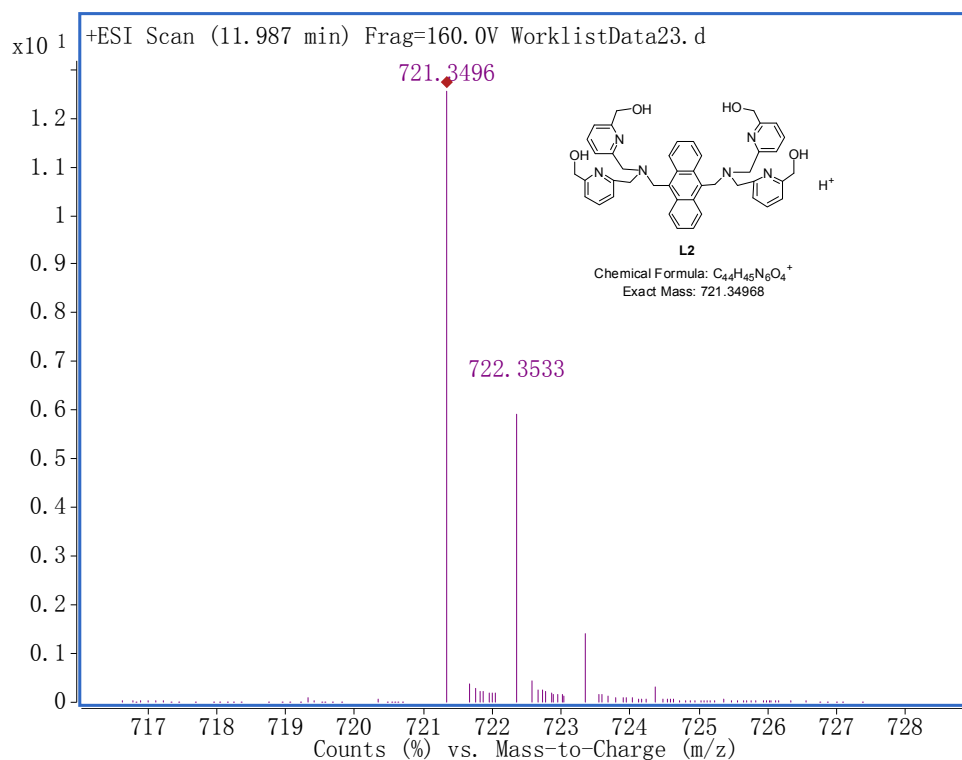

HR-MS spectrum of **L2**

**Synthesis of ZnL2:** To a solution of **L2** (36 mg, 0.05 mmol) in 5 mL of MeOH, was added  $\text{Zn}(\text{NO}_3)_2 \cdot 6\text{H}_2\text{O}$  (33 mg, 0.11 mmol), and the mixture was stirred for 1 h at rt. After concentrating under reduced pressure, the obtained solid was recrystallised from MeOH to give **ZnL2**.  $^1\text{H}$  NMR (400 MHz,  $\text{D}_2\text{O}$ ): 8.44(4H, br, PyH), 7.68 (4H, d,  $J = 4.8$  Hz, PyH), 7.47 (4H, dd,  $J = 4.8$  Hz, PyH), 6.95 (4H, d, ArH), 6.37 (4H, br, ArH), 5.11 (4H, br,  $2\text{CH}_2$ ), 4.61 (4H, br,  $2\text{CH}_2$ ), 4.52 (4H, br,  $2\text{CH}_2$ ), 4.24 (4H, br,  $2\text{CH}_2$ ), 4.09 (4H, br,  $2\text{CH}_2$ ). Crystal of **ZnL2** suitable for X-ray diffraction studies was obtained from a solution of **ZnL2** in a mixture of MeOH and water after addition of NaCl. Each complex molecule contains two  $\text{CH}_3\text{OH}$  and two  $\text{NO}_3^-$  as counter ions. The total formula of **ZnL2** crystal is  $\text{C}_{46}\text{H}_{52}\text{Cl}_2\text{N}_8\text{O}_{12}\text{Zn}_2$  ( $\text{C}_{44}\text{H}_{44}\text{Cl}_2\text{N}_6\text{O}_4\text{Zn}_2^{2+} \cdot 2\text{CH}_3\text{OH} \cdot 2\text{NO}_3^-$ ),  $M = 1110.62$ . [CCDC 949746](#) contains the supplementary crystallographic data for this paper. These data can be obtained free of charge from the Cambridge Crystallographic Data Centre via [www.ccdc.cam.ac.uk/data\\_request/cif](http://www.ccdc.cam.ac.uk/data_request/cif).

*Crystal data for ZnL2:*

Table 1. Crystal data and structure refinement for mo\_111219a\_0m.

|                                   |                                                               |                           |
|-----------------------------------|---------------------------------------------------------------|---------------------------|
| Identification code               | mo_111219a_0m                                                 |                           |
| Empirical formula                 | C23 H26 Cl N4 O6 Zn                                           |                           |
| Formula weight                    | 555.30                                                        |                           |
| Temperature                       | 100(2) K                                                      |                           |
| Wavelength                        | 0.71073 Å                                                     |                           |
| Crystal system                    | Monoclinic                                                    |                           |
| Space group                       | P2(1)/n                                                       |                           |
| Unit cell dimensions              | a = 14.6762(14) Å                                             | $\alpha = 90^\circ$       |
|                                   | b = 8.8145(8) Å                                               | $\beta = 92.436(2)^\circ$ |
|                                   | c = 17.7485(16) Å                                             | $\gamma = 90^\circ$       |
| Volume                            | 2293.9(4) Å <sup>3</sup>                                      |                           |
| Z                                 | 4                                                             |                           |
| Density (calculated)              | 1.608 Mg/m <sup>3</sup>                                       |                           |
| Absorption coefficient            | 1.237 mm <sup>-1</sup>                                        |                           |
| F(000)                            | 1148                                                          |                           |
| Crystal size                      | 0.16 x 0.12 x 0.10 mm <sup>3</sup>                            |                           |
| Theta range for data collection   | 1.76 to 26.00°.                                               |                           |
| Index ranges                      | -18<= <i>h</i> <=18, -10<= <i>k</i> <=10, -19<= <i>l</i> <=21 |                           |
| Reflections collected             | 15921                                                         |                           |
| Independent reflections           | 4489 [R(int) = 0.0465]                                        |                           |
| Completeness to theta = 26.00     | 99.6 %                                                        |                           |
| Absorption correction             | None                                                          |                           |
| Max. and min. transmission        | 0.8863 and 0.8267                                             |                           |
| Refinement method                 | Full-matrix least-squares on F <sup>2</sup>                   |                           |
| Data / restraints / parameters    | 4489 / 10 / 334                                               |                           |
| Goodness-of-fit on F <sup>2</sup> | 1.092                                                         |                           |
| Final R indices [I>2sigma(I)]     | R1 = 0.0402, wR2 = 0.1055                                     |                           |
| R indices (all data)              | R1 = 0.0591, wR2 = 0.1194                                     |                           |
| Extinction coefficient            | 0.0030(6)                                                     |                           |
| Largest diff. peak and hole       | 0.834 and -0.465 e. <sup>-3</sup>                             |                           |

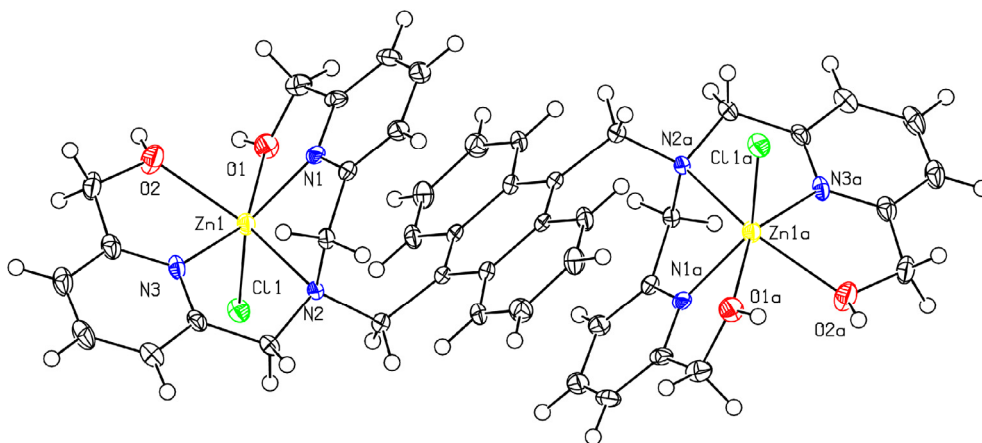

**Fig. S1.** The crystal structure of **ZnL2**

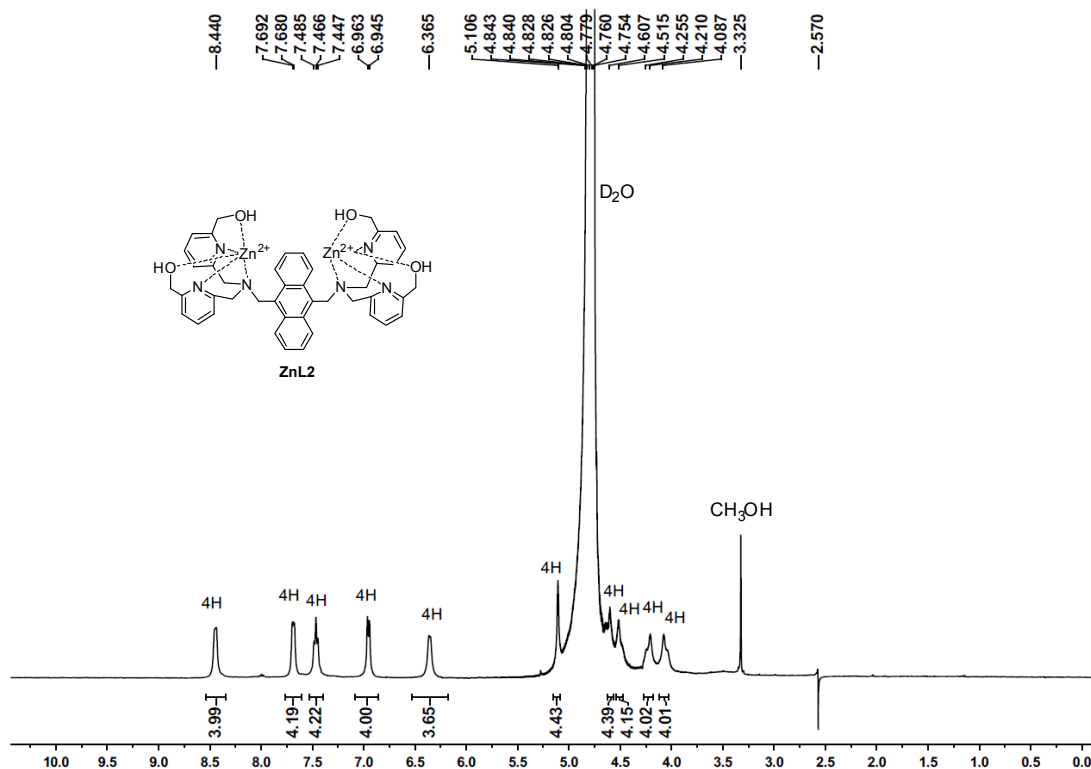<sup>1</sup>H NMR spectrum of **ZnL2** in D<sub>2</sub>O

## References:

1. (a) Gassensmith, J. J.; Arunkumar, E.; Barr, L.; Baumes, J. M.; DiVittorio, K. M.; Johnson, J. R.; Noll, B. C.; Smith, B. D. *J. Am. Chem. Soc.* **2007**, *129*, 15054–15059. (b) Gunnlaugsson, T.; Davis, A. P.; O'Brien, J. E.; Glynn, M. *Org. Lett.* **2002**, *4*, 2449–2452. (c) Gunnlaugsson, T.; Davis, A. P.; O'Brien, J. E.; Glynn, M. *Org. Biomol. Chem.* **2005**, *3*, 48–56.
2. Thiabaud, G.; Guillemot, G.; Schmitz-Afonso, I.; Colasson, B.; Reinaud, O. *Angew. Chem., Int. Ed.* **2009**, *48*, 7383–7386.

### 3. Fluorescence spectra changes of ZnL2 (5 $\mu\text{M}$ ) upon addition of different anions

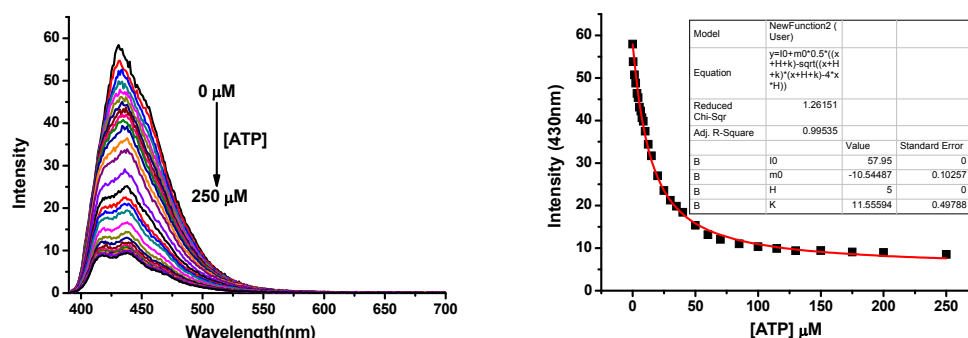

**Fig. S2** Left: Fluorescent titration of complex **ZnL2** (5  $\mu\text{M}$ ) upon the addition of ATP (0-250  $\mu\text{M}$ ) in pH = 7.2, 10 mM HEPES buffer solution at 25°C; Right: The saturation curve of fluorescent intensity changes at 430 nm,  $\lambda_{\text{ex}}$  = 380 nm,  $d_{\text{ex}}$  = 5 nm,  $d_{\text{em}}$  = 2.5 nm. Red line is the curve fitting using a 1:1 binding mode, and the  $K_a$  between **ZnL2** and ATP was determined to be about  $8.65 \times 10^4 \text{ M}^{-1}$  ( $R^2 = 0.99535$ ) under this condition.

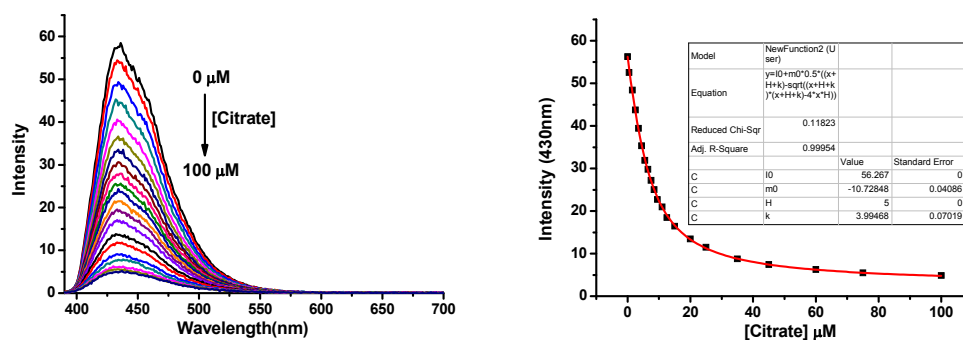

**Fig. S3** Left: Fluorescent titration of complex **ZnL2** (5  $\mu\text{M}$ ) upon the addition of citrate (0-100  $\mu\text{M}$ ) in pH = 7.2, 10 mM HEPES buffer solution at 25°C; Right: The saturation curve of fluorescent intensity changes at 430 nm,  $\lambda_{\text{ex}}$  = 380 nm,  $d_{\text{ex}}$  = 5 nm,  $d_{\text{em}}$  = 2.5 nm. Red line is the curve fitting using a 1:1 binding mode, and the  $K_a$  between **ZnL2** and citrate was determined to be about  $2.51 \times 10^5 \text{ M}^{-1}$  ( $R^2 = 0.99954$ ) under this condition.

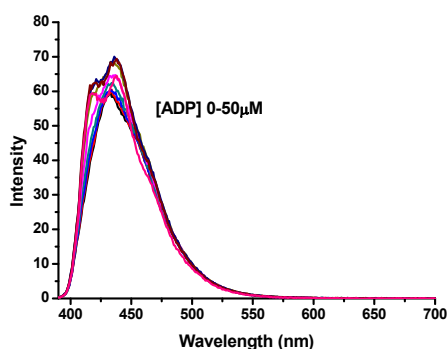

**Fig. S4.** Fluorescent titration of complex **ZnL2** (5  $\mu\text{M}$ ) upon the addition of ADP (0-50  $\mu\text{M}$ ) in pH = 7.2, 10 mM HEPES buffer solution at 25°C,  $\lambda_{\text{ex}}$  = 380 nm,  $d_{\text{ex}}$  = 5 nm,  $d_{\text{em}}$  = 2.5 nm.

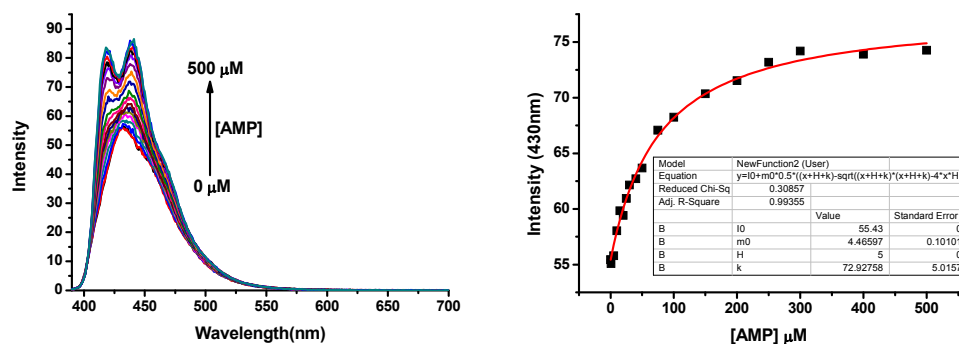

**Fig. S5.** Left: Fluorescent titration of complex **ZnL2** (5  $\mu\text{M}$ ) upon the addition of AMP (0-500  $\mu\text{M}$ ) in pH = 7.2, 10 mM HEPES buffer solution at 25°C; Right: The saturation curve of fluorescent intensity changes at 430 nm,  $\lambda_{\text{ex}}$  = 380 nm,  $d_{\text{ex}}$  = 5 nm,  $d_{\text{em}}$  = 2.5 nm. Red line is the curve fitting using a 1:1 binding mode, and the  $K_a$  between **ZnL2** and AMP was determined to be about  $1.37 \times 10^4 \text{ M}^{-1}$  ( $R^2 = 0.99355$ ) under this condition.

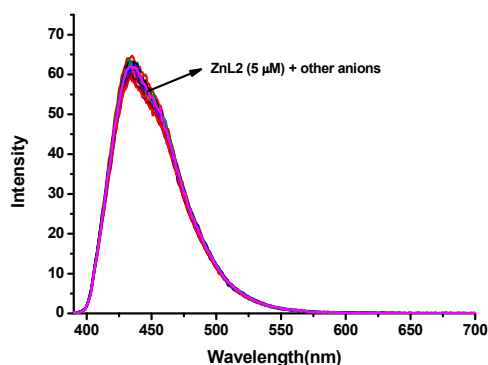

**Fig. S6.** Fluorescent titration of complex **ZnL2** (5  $\mu\text{M}$ ) upon the addition of other anions ( $\text{PO}_4^{3-}$ ,  $\text{HPO}_4^{2-}$ ,  $\text{H}_2\text{PO}_4^-$ ,  $\text{F}^-$ ,  $\text{Cl}^-$ ,  $\text{Br}^-$ ,  $\text{I}^-$ ,  $\text{ClO}_4^-$ ,  $\text{AcO}^-$ ,  $\text{CO}_3^{2-}$ ,  $\text{HCO}_3^-$ ,  $\text{SO}_4^{2-}$ ,  $\text{HSO}_4^-$ ,  $\text{NO}_3^-$ ,  $\text{N}_3^-$ ,  $\text{NO}_2^-$ ,  $\text{SCN}^-$ ,  $\text{S}_2\text{O}_3^{2-}$ ,  $\text{S}_2\text{O}_7^{2-}$ , 50  $\mu\text{M}$  of each was used) in pH = 7.2, 10 mM HEPES buffer solution,  $\lambda_{\text{ex}}$  = 380 nm,  $d_{\text{ex}}$  = 5 nm,  $d_{\text{em}}$  = 2.5 nm.

#### 4. Fluorescence spectra changes of ZnL2 (50 $\mu\text{M}$ ) upon addition of different anions

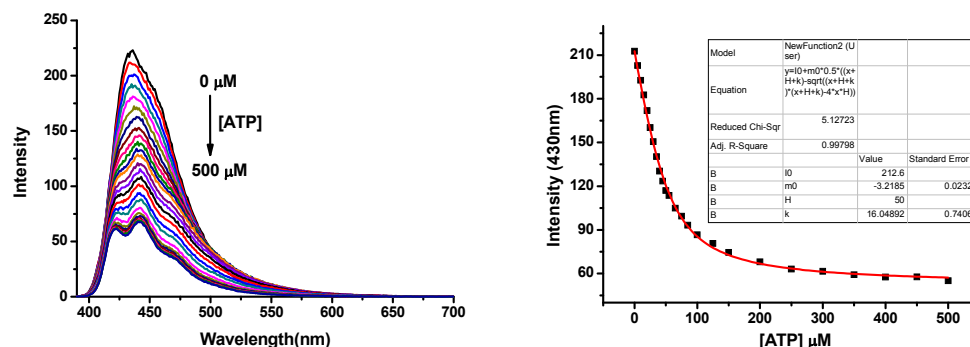

**Fig. S7.** Left: Fluorescent titration of complex **ZnL2** (50  $\mu\text{M}$ ) upon the addition of ATP (0-500  $\mu\text{M}$ ) in pH = 7.2, 10 mM HEPES buffer solution at 25°C; Right: The saturation curve of fluorescent intensity changes at 430 nm,  $\lambda_{\text{ex}} = 380$  nm,  $d_{\text{ex}} = d_{\text{em}} = 2.5$  nm. Nonlinear least-squares fitting the fluorescent titration curve gave  $K_a$  between **ZnL2** and ATP is  $6.23 \times 10^4 \text{ M}^{-1}$  ( $R^2 = 0.99798$ ) under this condition.

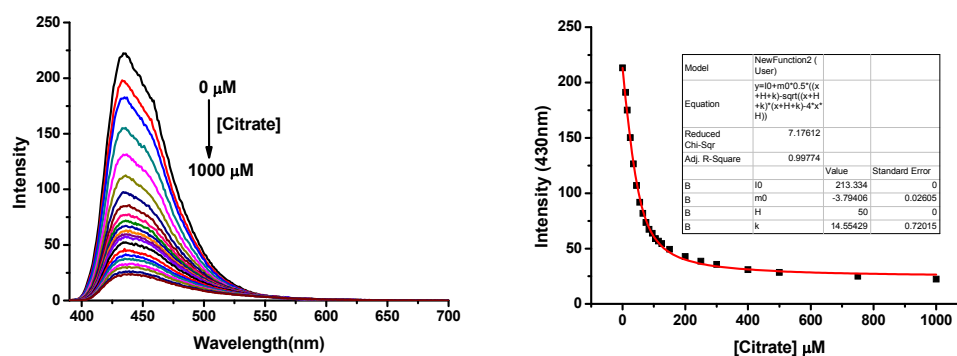

**Fig. S8.** Left: Fluorescent titration of complex **ZnL2** (50  $\mu\text{M}$ ) upon the addition of citrate (0-1000  $\mu\text{M}$ ) in pH = 7.2, 10 mM HEPES buffer solution at 25°C; Right: The saturation curve of fluorescent intensity changes at 430 nm,  $\lambda_{\text{ex}} = 380$  nm,  $d_{\text{ex}} = d_{\text{em}} = 2.5$  nm. Nonlinear least-squares fitting the fluorescent titration curve gave  $K_a$  between **ZnL2** and citrate is  $6.87 \times 10^4 \text{ M}^{-1}$  ( $R^2 = 0.99774$ ) under this condition.

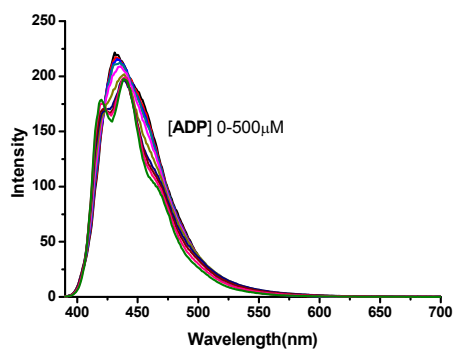

**Fig. S9.** Fluorescent titration of complex **ZnL2** (50  $\mu\text{M}$ ) upon the addition of ADP (0-500  $\mu\text{M}$ ) in pH = 7.2, 10 mM HEPES buffer solution at 25°C,  $\lambda_{\text{ex}} = 380$  nm,  $d_{\text{ex}} = d_{\text{em}} = 2.5$  nm.



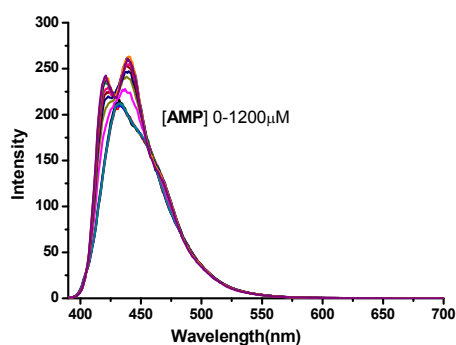

**Fig. S10.** Fluorescent titration of complex **ZnL2** (50  $\mu\text{M}$ ) upon the addition of AMP (0-1200  $\mu\text{M}$ ) in pH = 7.2, 10 mM HEPES buffer solution at 25°C,  $\lambda_{\text{ex}}$  = 380 nm,  $d_{\text{ex}}$  =  $d_{\text{em}}$  = 2.5 nm.

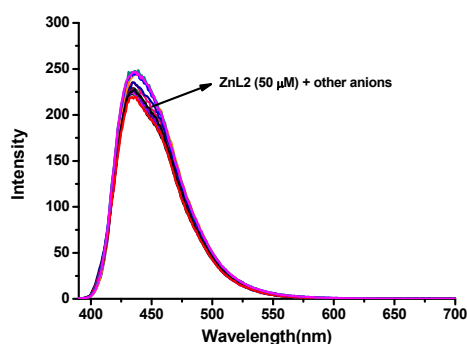

**Fig. S11.** Fluorescent titration of complex **ZnL2** (50  $\mu\text{M}$ ) upon the addition of other anions ( $\text{PO}_4^{3-}$ ,  $\text{HPO}_4^{2-}$ ,  $\text{H}_2\text{PO}_4^-$ ,  $\text{F}^-$ ,  $\text{Cl}^-$ ,  $\text{Br}^-$ ,  $\text{I}^-$ ,  $\text{ClO}_4^-$ ,  $\text{AcO}^-$ ,  $\text{CO}_3^{2-}$ ,  $\text{HCO}_3^-$ ,  $\text{SO}_4^{2-}$ ,  $\text{HSO}_4^-$ ,  $\text{S}_2\text{O}_7^{2-}$ ,  $\text{S}_2\text{O}_3^{2-}$ ,  $\text{SCN}^-$ ,  $\text{NO}_3^-$ ,  $\text{N}_3^-$ ,  $\text{NO}_2^-$ , 500  $\mu\text{M}$  of each) in pH = 7.2, 10 mM HEPES buffer solution at 25°C,  $\lambda_{\text{ex}}$  = 380 nm,  $d_{\text{ex}}$  =  $d_{\text{em}}$  = 2.5 nm.

**Table S1** Summary of the apparent association constants ( $K_a$ ) of receptors **ZnL1** and **ZnL2** to some anion species.

| Anions                    | $K_a$ ( $\text{M}^{-1}$ ) between receptor and anions |                                                             |                                                              |
|---------------------------|-------------------------------------------------------|-------------------------------------------------------------|--------------------------------------------------------------|
|                           | <b>ZnL1</b> <sup>a</sup>                              | <b>ZnL2</b> <sup>b</sup><br>(when 5 $\mu\text{M}$ was used) | <b>ZnL2</b> <sup>b</sup><br>(when 50 $\mu\text{M}$ was used) |
| PPi                       | Not reported                                          | $5.39 \times 10^5$                                          | $7.68 \times 10^5$                                           |
| $\text{NaH}_2\text{PO}_4$ | $2.9 \times 10^5$                                     | - <sup>c</sup>                                              | - <sup>c</sup>                                               |
| ATP                       | $4.0 \times 10^5$                                     | $8.65 \times 10^4$                                          | $6.23 \times 10^4$                                           |
| ADP                       | $1.6 \times 10^5$                                     | - <sup>c</sup>                                              | - <sup>c</sup>                                               |
| AMP                       | $9.1 \times 10^3$                                     | $1.37 \times 10^4$                                          | - <sup>c</sup>                                               |
| Citrate                   | Not reported                                          | $2.51 \times 10^5$                                          | $6.87 \times 10^4$                                           |

<sup>a</sup>: Literature values (A. Ojida, Y. Mito-oka, K. Sada, I. Hamachi, *J. Am. Chem. Soc.*, 2004, **126**, 2454-2463, see page 2456). <sup>b</sup>: Experimental values in this work, see above figures. <sup>c</sup>:  $K_a$  was not determined due to too small changes of fluorescence. Note: Much higher ion strength conditions (50 mM HEPES, 50 mM NaCl, pH 7.2) were used in the literature for the  $K_a$  measurement between **ZnL1** and ATP, ADP and AMP. Take this factor into consideration, from the  $K_a$  values of ATP between **ZnL1** and **ZnL2**, introducing  $-\text{CH}_2\text{OH}$  groups to **ZnL1** may decrease its binding affinities to phosphate anions.

## 5. The fluorescence colour changes of ZnL2 upon addition of different anions

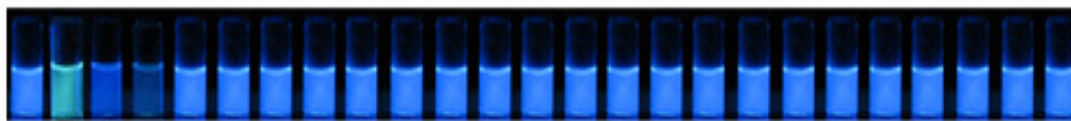

**Fig. S12.** Fluorescence colour (under 365 nm light) changes of **ZnL2** (50  $\mu\text{M}$ ) in 10 mM aqueous HEPES buffer solution (pH = 7.2) with 500  $\mu\text{M}$  of different anions (from left to right: none, PPI, ATP, Citrate, ADP, AMP,  $\text{PO}_4^{3-}$ ,  $\text{HPO}_4^{2-}$ ,  $\text{H}_2\text{PO}_4^-$ ,  $\text{F}^-$ ,  $\text{Cl}^-$ ,  $\text{Br}^-$ ,  $\text{I}^-$ ,  $\text{ClO}_4^-$ ,  $\text{AcO}^-$ ,  $\text{CO}_3^{2-}$ ,  $\text{HCO}_3^-$ ,  $\text{SO}_4^{2-}$ ,  $\text{HSO}_4^-$ ,  $\text{S}_2\text{O}_7^{2-}$ ,  $\text{S}_2\text{O}_3^{2-}$ ,  $\text{SCN}^-$ ,  $\text{NO}_3^-$ ,  $\text{N}_3^-$ ,  $\text{NO}_2^-$ ).

## 6. The effect of concentration of ZnL2-PPI on anthracene-excimer formation

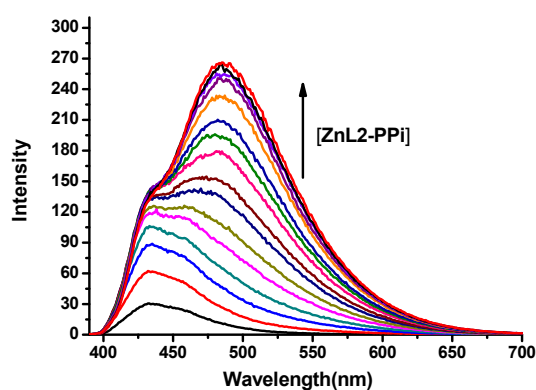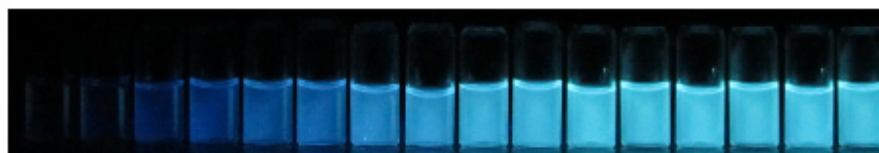

**Fig. S13.** Top: Fluorescent spectra of **ZnL2-PPI** (5, 10, 15, 20, 25, 30, 35, 40, 45, 50, 55, 60, 65, 70, 75 and 80  $\mu\text{M}$ ) in 10 mM HEPES buffer solution (pH = 7.2) at 25°C with  $\lambda_{\text{ex}} = 380 \text{ nm}$ ,  $d_{\text{ex}} = 5 \text{ nm}$ ,  $d_{\text{em}} = 2.5 \text{ nm}$ . Down: Emission color changes of **ZnL2-PPI** under UV light of 365 nm. The concentration of **ZnL2-PPI** from left to right: 5, 10, 15, 20, 25, 30, 35, 40, 45, 50, 55, 60, 65, 70, 75 and 80  $\mu\text{M}$ , respectively.

## 7. The effect of buffer concentration and salts on PPI induced anthracene-excimer formation

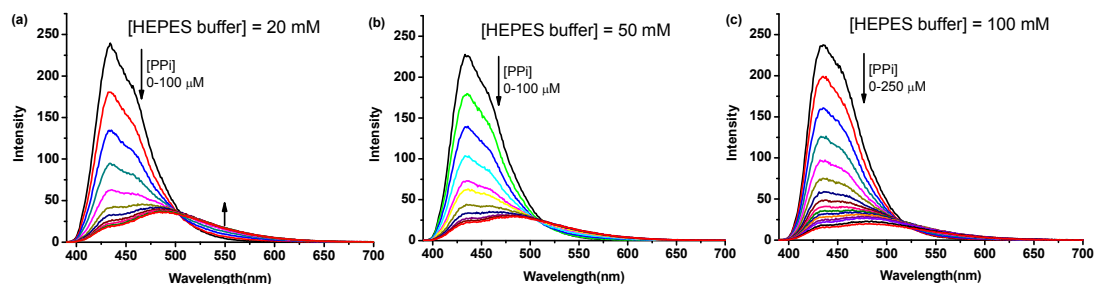

**Fig. S14.** The effect of buffer concentration on PPI induced anthracene-excimer formation. HEPES

buffer concentration (a) 20 mM; (b) 50 mM; (c) 100 mM. All experiments were measured at 25°C and  $[\text{ZnL2}] = 50 \mu\text{M}$ . These experiments indicate that the excimer formation is more difficult at higher buffer concentrations.

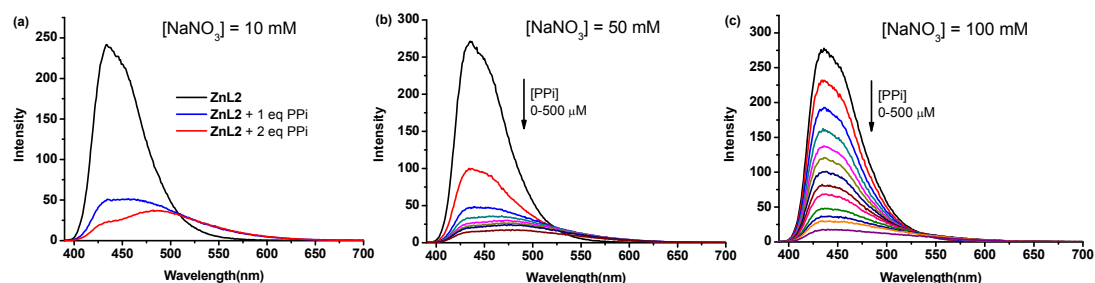

**Fig. S15.** The effect of presence of salts on PPI induced anthracene-excimer formation. NaNO<sub>3</sub> concentration (a) 10 mM; (b) 50 mM; (c) 100 mM. All experiments were measured in 10 mM HEPES buffer (pH 7.2) at 25°C and  $[\text{ZnL2}] = 50 \mu\text{M}$ . These experiments indicate that the excimer formation is tending to be hindered at higher salts concentrations.

#### 8. The effect of temperature (T) on PPI induced anthracene-excimer formation

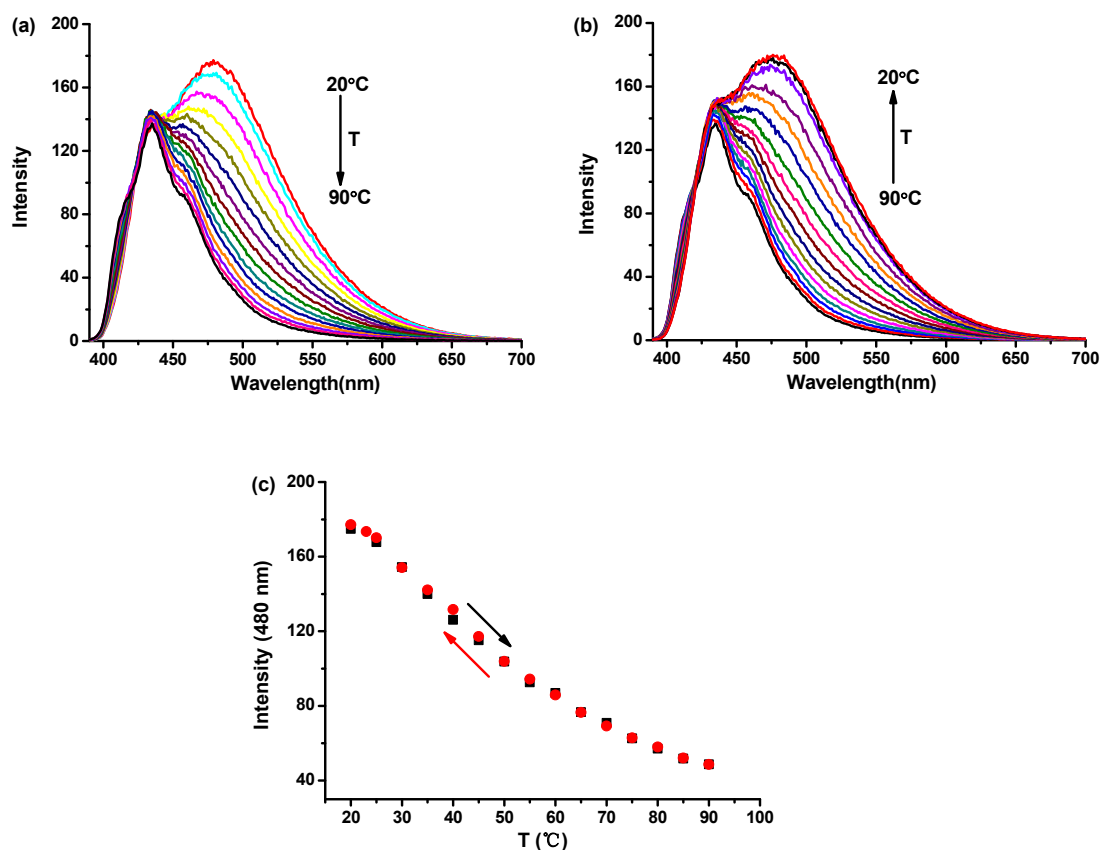

**Fig. S16.** (a) The fluorescence spectra changes of **ZnL2**-PPI (50 μM) as temperature increased from 20°C to 90°C. (b) The fluorescence spectra changes of **ZnL2**-PPI (50 μM) as temperature decreased from 90°C to 20°C. (c) A plot of fluorescence intensity changes of **ZnL2**-PPI (50 μM) at 480 nm as a function of temperature increase (■) or decrease (●). All spectra were measured in

10 mM HEPES buffer solution (pH = 7.2) with  $\lambda_{\text{ex}} = 380 \text{ nm}$ ,  $d_{\text{ex}} = 5 \text{ nm}$ ,  $d_{\text{em}} = 2.5 \text{ nm}$ .

### 9. Job's plot examined between ZnL2 and PPI, ATP and citrate

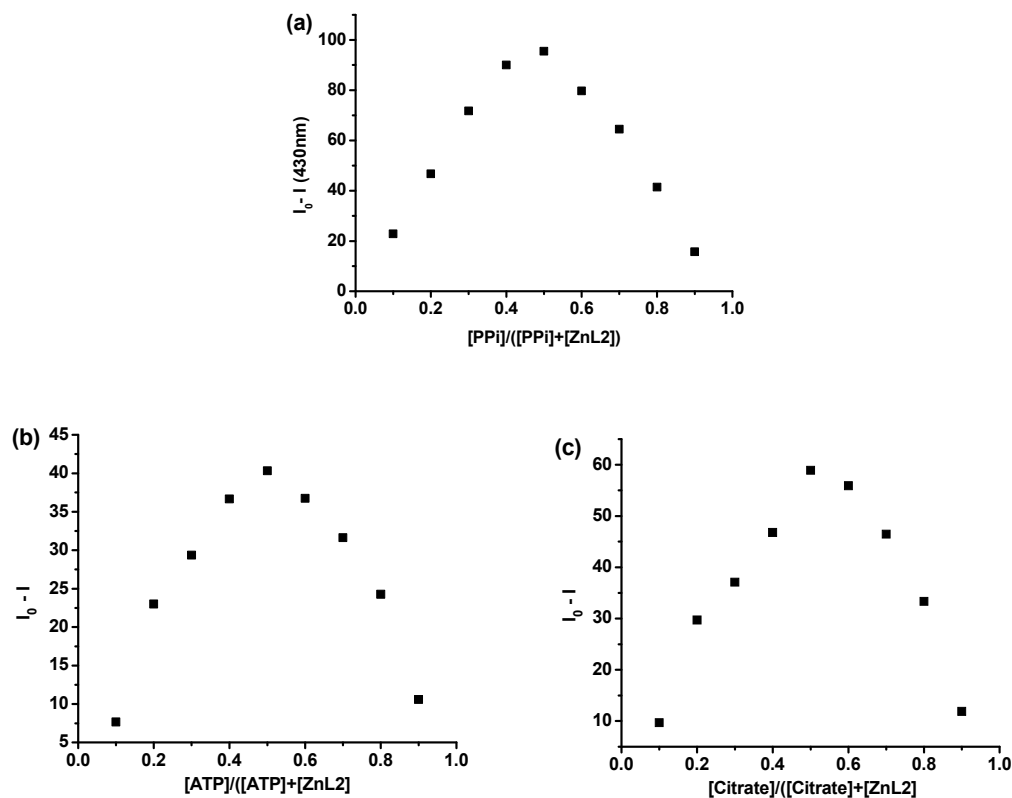

**Fig. S17.** Job's plot examined between **ZnL2** and PPI (a), ATP (b) and citrate (c) in 10 mM HEPES buffer (pH = 7.2) solution at 25°C. All experiments were explored at  $[\text{PPI}, \text{ATP or citrate}] + [\text{ZnL2}] = 50 \mu\text{M}$  and with  $\lambda_{\text{ex}} = 380 \text{ nm}$ ,  $d_{\text{ex}} = 2.5 \text{ nm}$ ,  $d_{\text{em}} = 2.5 \text{ nm}$ .

### 10. The $^{31}\text{P}$ NMR and Mass studies

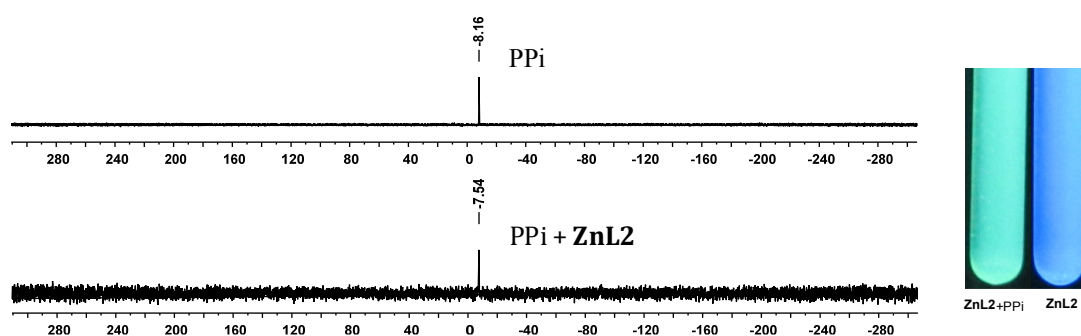

**Fig. S18.** Left:  $^{31}\text{P}$  NMR spectra of PPI, and a mixture of PPI and **ZnL2** (1 mM of each) in  $\text{D}_2\text{O}$ . Right: The fluorescence color of **ZnL2** (1mM) under 365 nm in the presence and absence of PPI in the NMR tube.

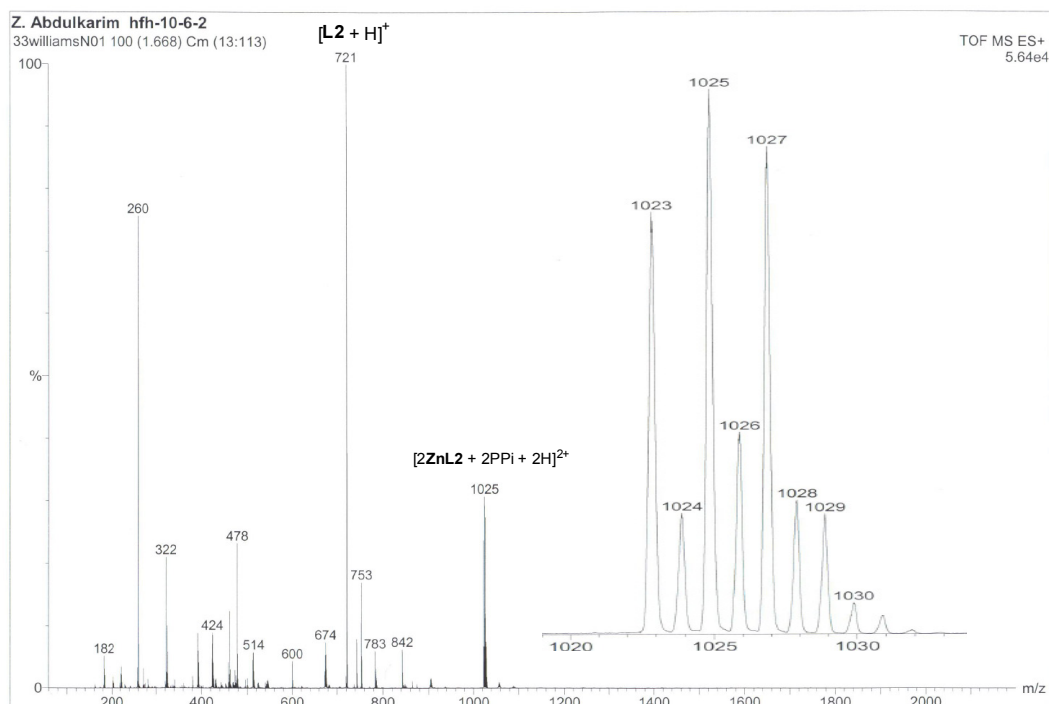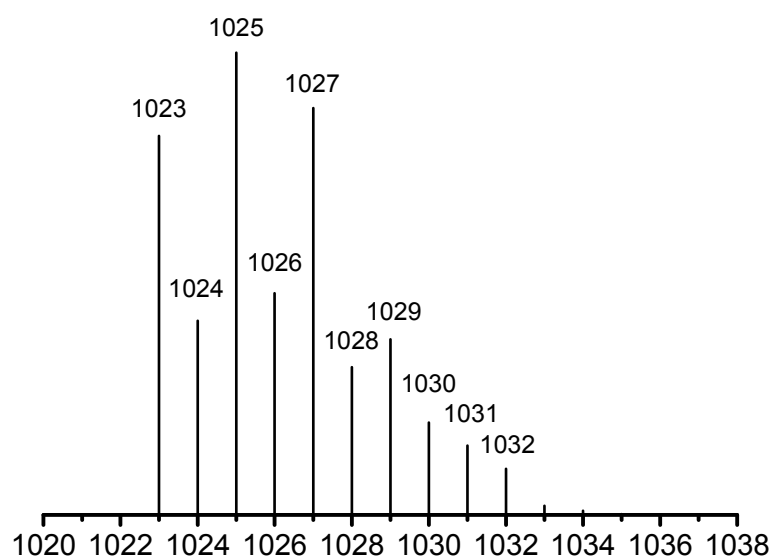

Isotopic Distributions Calculated

**Fig. S19.** Top: Mass spectrum of a mixture of **ZnL2** and PPI (50  $\mu$ M each). The peak at  $m/z = 1023$  corresponds to  $[C_{88}H_{90}N_{12}O_{22}P_4Zn_4]^{2+}$  ( $= [2ZnL2 + 2PPI + 2H]^{2+}$ , which Mass was calculated as 2046). Bottom: Isotopic distribution calculated for  $C_{44}H_{45}N_6O_{11}P_2Zn_2$  using a program in [www.chemcalc.org](http://www.chemcalc.org).

## Elemental Composition Report

Single Mass Analysis

Tolerance = 5.0 PPM / DBE: min = -1.5, max = 50.0

Isotope cluster parameters: Separation = 1.0 Abundance = 1.0%

Monoisotopic Mass, Odd and Even Electron Ions

3 formula(e) evaluated with 1 results within limits (up to 50 closest results for each mass)

| Minimum:  |            | -1.5  |      |      |       |                                                                                               |
|-----------|------------|-------|------|------|-------|-----------------------------------------------------------------------------------------------|
| Maximum:  |            | 200.0 | 5.0  | 50.0 |       |                                                                                               |
| Mass      | Calc. Mass | mDa   | PPM  | DBE  | Score | Formula                                                                                       |
| 1023.1177 | 1023.1204  | -2.7  | -2.7 | 26.5 | 1     | C <sub>44</sub> H <sub>45</sub> N <sub>6</sub> O <sub>11</sub> P <sub>2</sub> Zn <sub>2</sub> |

## Z. Abdulkarim hf-10-6-2

37williamsN05 106 (1.767) AM (Cen,4, 80.00, Ar,5000.0,1053.60,1.00); Cm (3:238)

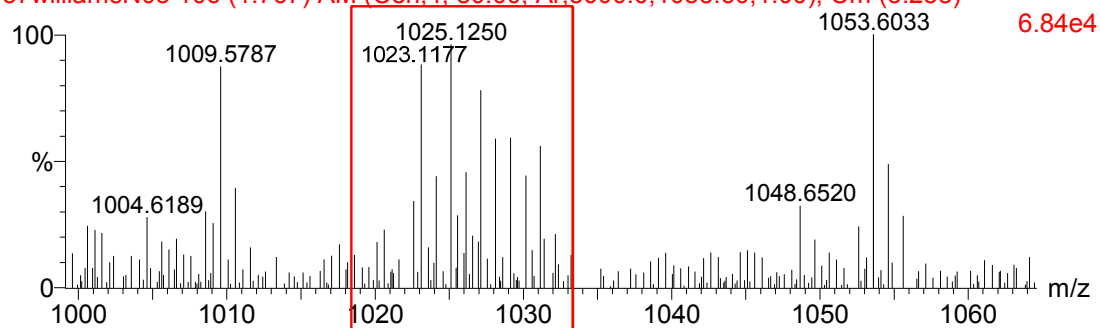

**Fig. S20.** High Resolution Mass spectrum of a mixture of **ZnL2** and PPI (50  $\mu$ M each). The peak at  $m/z = 1023.1177$  corresponds to formula C<sub>44</sub>H<sub>45</sub>N<sub>6</sub>O<sub>11</sub>P<sub>2</sub>Zn<sub>2</sub>, which was calculated as 1023.1204.
